# Supplementary material for: Integrated Placental Modelling of Histology with Gene Expression to Identify Functional Impact on Fetal Growth
Source: MDPI journal article supplement (doi:10.3390/cells12071093), 2023-04-06
Supplement: s1 [file s1]

# 1 SUPPLEMENTARY INFORMATION

## 2 Supplementary Table S1: Full phenotype clinical data.

| ID        | Status   | Medical history | Pregnancy complications | Maternal age quartile (years) | Ethnicity | Maternal booking BMI | Delivery mode    | Gestation | Birthweight (g) | Infant sex | Placenta weight (g) | Placenta/BW ratio (%) | Analysis comments |
|-----------|----------|-----------------|-------------------------|-------------------------------|-----------|----------------------|------------------|-----------|-----------------|------------|---------------------|-----------------------|-------------------|
| Control 1 | Control  |                 |                         | 31-35                         | Asian     | 34                   | Vaginal delivery | 39+6      | 3200            | Male       | 442                 | 13.8                  |                   |
| Control 2 | Control  |                 |                         | 36-40                         | White     | 21                   | cat4 CS          | 39+1      | 3690            | Female     | 516                 | 14.0                  |                   |
| Control 3 | Control  |                 |                         | 21-25                         | White     | 20                   | Vaginal delivery | 39+0      | 3800            | Female     | 534                 | 14.1                  |                   |
| Control 4 | Control  |                 |                         | 31-35                         | White     | 23                   | cat3 CS          | 41+1      | 3970            | Male       | 509                 | 12.8                  |                   |
| Control 5 | Control  |                 |                         | 41-45                         | White     | 27                   | cat4 CS          | 39+1      | 3960            | Female     | 481                 | 12.1                  |                   |
| Control 6 | Control  |                 |                         | 36-40                         | White     | 24                   | cat4 CS          | 39+1      | 2893            | Female     | 413                 | 14.3                  |                   |
| Control 7 | Control  |                 |                         | 36-40                         | White     | 23                   | Vaginal delivery | 39+0      | 3618            | Male       | 491                 | 13.6                  |                   |
| Control 8 | Control  |                 |                         | 36-40                         | White     | 23                   | cat4 CS          | 39+1      | 3140            | Male       | 398                 | 12.7                  |                   |
| Control 9 | Control  |                 |                         | 31-35                         | White     | 28                   | Vaginal delivery | 39+5      | 3510            | Male       | 526                 | 15.0                  |                   |
| FGR 1     | Late FGR |                 |                         | 31-35                         | White     | 23                   | cat3 CS          | 37+0      | 1410            | Male       | 160                 | 11.3                  |                   |

|       |          |             |                      |       |                |    |                  |      |      |        |     |      |                  |
|-------|----------|-------------|----------------------|-------|----------------|----|------------------|------|------|--------|-----|------|------------------|
| FGR 2 | Late FGR | Hypothyroid |                      | 31-35 | White          | 22 | Vaginal delivery | 37+5 | 2510 | Female | 346 | 13.8 |                  |
| FGR 3 | Late FGR | Migraines   |                      | 31-35 | Chinese        | 22 | cat2 CS          | 37+2 | 2560 | Male   | 380 | 14.8 |                  |
| FGR 4 | Late FGR |             | Low platelets        | 26-30 | Afro Caribbean | 22 | cat2 CS          | 38+2 | 1985 | Male   | 380 | 19.1 |                  |
| FGR 5 | Late FGR |             |                      | 31-35 | Chinese        | 20 | Vaginal delivery | 39+4 | 2720 | Female | 360 | 13.2 |                  |
| FGR 6 | Late FGR |             | Gestational diabetes | 31-35 | Asian          | 38 | cat1 CS          | 38+4 | 2396 | Male   | 355 | 14.8 |                  |
| FGR 7 | Late FGR |             |                      | 36-40 | Afro Caribbean | 28 | cat3 CS          | 39+0 | 2750 | Male   | 404 | 14.7 | Not run for qPCR |

3

4 CS = caesarean section. Cat1 = Immediate threat to the life of the woman or fetus, Cat2 = Maternal or fetal compromise which is not immediately  
5 life-threatening, Cat3 = No maternal or fetal compromise but needs early birth, Cat4 = Birth timed to suit woman or healthcare provider. (NICE  
6 guideline 192: Caesarean birth, published 31 March 2021).

7

**Supplementary Table S2: Morphological differences in the placenta by sampling location.**

|                                          | <b>Control (N=9)</b> |                   |                | <b>FGR (N=7)</b> |                   |                |
|------------------------------------------|----------------------|-------------------|----------------|------------------|-------------------|----------------|
|                                          | <b>Central</b>       | <b>Peripheral</b> | <b>P-value</b> | <b>Central</b>   | <b>Peripheral</b> | <b>P-value</b> |
| <b>Volume density (cm<sup>3</sup>/g)</b> |                      |                   |                |                  |                   |                |
| Intervillous space                       | 0.39±0.02            | 0.36±0.01         | 0.130          | 0.36±0.02        | 0.35±0.02         | 0.577          |
| Stem villi                               | 0.06±0.01            | 0.06±0.01         | 0.902          | 0.06±0.02        | 0.05±0.01         | 0.364          |
| Intermediate villi                       | 0.1±0.01             | 0.13±0.01         | 0.105          | 0.08±0.01        | 0.08±0.01         | 0.720          |
| Terminal villi                           | 0.42±0.02            | 0.42±0.02         | 0.941          | 0.41±0.03        | 0.38±0.03         | 0.526          |
| Syncytial knots                          | 0.02±0.00            | 0.02±0.00         | 0.633          | 0.01±0.00        | 0.01±0.00         | 0.591          |
| Fibrosis                                 | 0.01±0.00            | 0.02±0.01         | 0.443          | 0.07±0.02        | 0.13±0.03         | 0.091          |
| Trophoblast                              | 0.33±0.02            | 0.31±0.01         | 0.492          | 0.34±0.02        | 0.33±0.04         | 0.818          |
| Stromal                                  | 0.53±0.03            | 0.57±0.02         | 0.239          | 0.45±0.04        | 0.46±0.06         | 0.865          |
| Capillary                                | 0.14±0.01            | 0.12±0.01         | 0.139          | 0.21±0.03        | 0.21±0.03         | 0.963          |
| <b>Volume (cm<sup>3</sup>)</b>           |                      |                   |                |                  |                   |                |
| Intervillous space                       | 187.75±10.19         | 171.7±9.96        | 0.277          | 121.96±11.52     | 116.92±10.14      | 0.748          |
| Stem villi                               | 27.82±5.18           | 27.85±2.89        | 0.100          | 23.24±6.3        | 17.1±2.58         | 0.385          |
| Intermediate villi                       | 49.91±4.81           | 60.89±5.94        | 0.170          | 24.77±2.83       | 26.19±2.23        | 0.700          |
| Terminal villi                           | 199.23±8.7           | 202.24±13.7       | 0.855          | 141.08±17.48     | 129.51±15.51      | 0.630          |
| Syncytial knots                          | 8.89±0.9             | 7.89±1.12         | 0.495          | 2.24±0.66        | 2.63±0.82         | 0.720          |
| Fibrosis                                 | 3.9±1.93             | 7.87±4.69         | 0.446          | 26.28±6.89       | 47.77±9.57        | 0.094          |
| Trophoblast                              | 156.49±6.76          | 150.51±8.25       | 0.583          | 117.28±13.22     | 112.13±15.07      | 0.802          |

|                                                                |              |              |       |              |              |       |
|----------------------------------------------------------------|--------------|--------------|-------|--------------|--------------|-------|
| Stromal                                                        | 254.68±18.75 | 271.49±12.97 | 0.472 | 150.39±19.02 | 156.07±25.00 | 0.860 |
| Capillary                                                      | 67.72±5.88   | 56.89±5.04   | 0.181 | 73.05±14.18  | 72.51±13.58  | 0.979 |
| <b>Barrier thickness (μm)</b>                                  |              |              |       |              |              |       |
| Arithmetic mean                                                | 2.84±0.08    | 2.82±0.10    | 0.885 | 2.84±0.19    | 2.86±0.18    | 0.940 |
| Harmonic mean                                                  | 2.14±0.07    | 2.15±0.07    | 0.918 | 2.24±0.15    | 2.24±0.14    | 0.987 |
| Thickness uniformity index                                     | 1.33±0.02    | 1.31±0.02    | 0.508 | 1.47±0.08    | 1.48±0.08    | 0.936 |
| <b>Surface density (cm<sup>2</sup>/cm<sup>3</sup>)</b>         |              |              |       |              |              |       |
| Villi                                                          | 613.67±27.94 | 607.22±24.07 | 0.863 | 634.49±43.19 | 626.07±47.42 | 0.898 |
| Fetal capillary                                                | 318.63±27.71 | 277.88±13.62 | 0.206 | 406.06±47.11 | 397.78±51.52 | 0.906 |
| <b>Surface area (m<sup>2</sup>)</b>                            |              |              |       |              |              |       |
| Villi                                                          | 15.32±0.97   | 15.99±0.92   | 0.622 | 10.87±1.63   | 10.3±1.51    | 0.801 |
| Fetal capillary                                                | 7.89±0.75    | 7.32±0.44    | 0.519 | 7.11±1.31    | 6.67±1.2     | 0.807 |
| <b>Theoretical diffusion capacity (cm<sup>2</sup>/min/kPa)</b> | 94.95±5.96   | 95.64±4.31   | 0.926 | 71.63±11.95  | 68.89±11.61  | 0.872 |
| <b>Specific diffusion capacity (cm<sup>2</sup>/min/kPa/g)</b>  | 27.15±1.86   | 27.24±1.23   | 0.968 | 30.24±4.58   | 28.7±3.71    | 0.798 |

**Supplementary Table S3: Summary tables of errors in all 27 models for each patient.**

| ONLY PERIPHERAL      |       |                  |        |        |         |        |        |            |        |        |
|----------------------|-------|------------------|--------|--------|---------|--------|--------|------------|--------|--------|
| ID                   | Score | STEREOLOGY & PCR |        |        | PCR     |        |        | STEREOLOGY |        |        |
|                      |       | xgbTree          | glmnet | nnet   | xgbTree | glmnet | nnet   | xgbTree    | glmnet | nnet   |
| Control 1            | 0     | 0 of 4           | 0 of 4 | 0 of 4 | 1 of 4  | 1 of 4 | 1 of 4 | 0 of 4     | 0 of 4 | 0 of 4 |
| Control 2            | 0     | 1 of 4           | 0 of 4 | 0 of 4 | 0 of 4  | 0 of 4 | 0 of 4 | 1 of 4     | 0 of 4 | 0 of 4 |
| Control 3            | 0     | 0 of 4           | 0 of 4 | 0 of 4 | 0 of 4  | 1 of 4 | 1 of 4 | 0 of 4     | 0 of 4 | 0 of 4 |
| Control 4            | 0     | 0 of 4           | 0 of 4 | 0 of 4 | 4 of 4  | 3 of 4 | 3 of 4 | 0 of 4     | 0 of 4 | 0 of 4 |
| Control 5            | 0     | 0 of 4           | 0 of 4 | 0 of 4 | 2 of 4  | 0 of 4 | 0 of 4 | 0 of 4     | 0 of 4 | 0 of 4 |
| Control 6            | 0     | 0 of 4           | 0 of 4 | 0 of 4 | 3 of 4  | 3 of 4 | 4 of 4 | 0 of 4     | 0 of 4 | 0 of 4 |
| Control 7            | 0     | 0 of 4           | 0 of 4 | 0 of 4 | 0 of 4  | 0 of 4 | 0 of 4 | 0 of 4     | 0 of 4 | 0 of 4 |
| Control 8            | 0     | 0 of 4           | 0 of 4 | 0 of 4 | 1 of 4  | 2 of 4 | 2 of 4 | 0 of 4     | 0 of 4 | 1 of 4 |
| Control 9            | 0     | 0 of 4           | 0 of 4 | 0 of 4 | 0 of 4  | 0 of 4 | 0 of 4 | 0 of 4     | 0 of 4 | 0 of 4 |
| FGR 1                | 1     | 4 of 4           | 0 of 4 | 0 of 4 | 4 of 4  | 4 of 4 | 4 of 4 | 0 of 4     | 0 of 4 | 0 of 4 |
| FGR 2                | 1     | 0 of 4           | 0 of 4 | 0 of 4 | 0 of 4  | 0 of 4 | 0 of 4 | 0 of 4     | 0 of 4 | 0 of 4 |
| FGR 3                | 1     | 0 of 4           | 0 of 4 | 0 of 4 | 0 of 4  | 0 of 4 | 0 of 4 | 0 of 4     | 0 of 4 | 0 of 4 |
| FGR 4                | 1     | 0 of 4           | 0 of 4 | 0 of 4 | 0 of 4  | 0 of 4 | 0 of 4 | 0 of 4     | 0 of 4 | 0 of 4 |
| FGR 5                | 1     | 0 of 4           | 0 of 4 | 0 of 4 | 0 of 4  | 0 of 4 | 0 of 4 | 0 of 4     | 0 of 4 | 0 of 4 |
| FGR 6                | 1     | 4 of 4           | 3 of 4 | 1 of 4 | 4 of 4  | 4 of 4 | 4 of 4 | 4 of 4     | 3 of 4 | 3 of 4 |
| ONLY CENTRAL         |       |                  |        |        |         |        |        |            |        |        |
| ID                   | Score | STEREOLOGY & PCR |        |        | PCR     |        |        | STEREOLOGY |        |        |
|                      |       | xgbTree          | glmnet | nnet   | xgbTree | glmnet | nnet   | xgbTree    | glmnet | nnet   |
| Control 1            | 0     | 0 of 4           | 0 of 4 | 0 of 4 | 0 of 4  | 0 of 4 | 0 of 4 | 0 of 4     | 0 of 4 | 0 of 4 |
| Control 2            | 0     | 0 of 4           | 0 of 4 | 0 of 4 | 0 of 4  | 0 of 4 | 0 of 4 | 0 of 4     | 0 of 4 | 0 of 4 |
| Control 3            | 0     | 0 of 4           | 0 of 4 | 0 of 4 | 2 of 4  | 2 of 4 | 0 of 4 | 0 of 4     | 0 of 4 | 0 of 4 |
| Control 4            | 0     | 0 of 4           | 0 of 4 | 0 of 4 | 2 of 4  | 3 of 4 | 3 of 4 | 0 of 4     | 0 of 4 | 0 of 4 |
| Control 5            | 0     | 0 of 4           | 0 of 4 | 0 of 4 | 0 of 4  | 0 of 4 | 0 of 4 | 0 of 4     | 0 of 4 | 0 of 4 |
| Control 6            | 0     | 3 of 4           | 2 of 4 | 1 of 4 | 3 of 4  | 3 of 4 | 3 of 4 | 0 of 4     | 0 of 4 | 0 of 4 |
| Control 7            | 0     | 0 of 4           | 0 of 4 | 0 of 4 | 0 of 4  | 0 of 4 | 0 of 4 | 0 of 4     | 0 of 4 | 0 of 4 |
| Control 8            | 0     | 2 of 4           | 0 of 4 | 1 of 4 | 0 of 4  | 0 of 4 | 1 of 4 | 2 of 4     | 1 of 4 | 1 of 4 |
| Control 9            | 0     | 0 of 4           | 0 of 4 | 0 of 4 | 1 of 4  | 2 of 4 | 1 of 4 | 0 of 4     | 0 of 4 | 0 of 4 |
| FGR 1                | 1     | 1 of 4           | 0 of 4 | 0 of 4 | 4 of 4  | 4 of 4 | 4 of 4 | 0 of 4     | 0 of 4 | 0 of 4 |
| FGR 2                | 1     | 0 of 4           | 0 of 4 | 0 of 4 | 0 of 4  | 0 of 4 | 0 of 4 | 0 of 4     | 0 of 4 | 0 of 4 |
| FGR 3                | 1     | 0 of 4           | 0 of 4 | 0 of 4 | 0 of 4  | 0 of 4 | 0 of 4 | 0 of 4     | 0 of 4 | 0 of 4 |
| FGR 4                | 1     | 0 of 4           | 0 of 4 | 0 of 4 | 0 of 4  | 0 of 4 | 0 of 4 | 1 of 4     | 0 of 4 | 0 of 4 |
| FGR 5                | 1     | 0 of 4           | 0 of 4 | 0 of 4 | 0 of 4  | 0 of 4 | 0 of 4 | 0 of 4     | 0 of 4 | 0 of 4 |
| FGR 6                | 1     | 4 of 4           | 4 of 4 | 4 of 4 | 4 of 4  | 4 of 4 | 4 of 4 | 3 of 4     | 4 of 4 | 4 of 4 |
| CENTRAL & PERIPHERAL |       |                  |        |        |         |        |        |            |        |        |
| ID                   | Score | STEREOLOGY & PCR |        |        | PCR     |        |        | STEREOLOGY |        |        |
|                      |       | xgbTree          | glmnet | nnet   | xgbTree | glmnet | nnet   | xgbTree    | glmnet | nnet   |
| Control 1            | 0     | 1 of 8           | 0 of 8 | 0 of 8 | 1 of 8  | 1 of 8 | 1 of 8 | 1 of 8     | 0 of 8 | 0 of 8 |
| Control 2            | 0     | 0 of 8           | 0 of 8 | 0 of 8 | 0 of 8  | 0 of 8 | 0 of 8 | 0 of 8     | 0 of 8 | 0 of 8 |
| Control 3            | 0     | 0 of 8           | 0 of 8 | 0 of 8 | 1 of 8  | 2 of 8 | 2 of 8 | 0 of 8     | 0 of 8 | 0 of 8 |
| Control 4            | 0     | 0 of 8           | 0 of 8 | 0 of 8 | 5 of 8  | 2 of 8 | 5 of 8 | 0 of 8     | 0 of 8 | 0 of 8 |
| Control 5            | 0     | 0 of 8           | 0 of 8 | 0 of 8 | 2 of 8  | 0 of 8 | 0 of 8 | 0 of 8     | 0 of 8 | 0 of 8 |
| Control 6            | 0     | 3 of 8           | 1 of 8 | 0 of 8 | 6 of 8  | 7 of 8 | 6 of 8 | 0 of 8     | 0 of 8 | 0 of 8 |
| Control 7            | 0     | 0 of 8           | 0 of 8 | 0 of 8 | 0 of 8  | 0 of 8 | 0 of 8 | 1 of 8     | 0 of 8 | 0 of 8 |
| Control 8            | 0     | 1 of 8           | 0 of 8 | 0 of 8 | 1 of 8  | 1 of 8 | 1 of 8 | 1 of 8     | 2 of 8 | 0 of 8 |
| Control 9            | 0     | 1 of 8           | 0 of 8 | 0 of 8 | 1 of 8  | 0 of 8 | 0 of 8 | 1 of 8     | 0 of 8 | 0 of 8 |
| FGR 1                | 1     | 0 of 8           | 0 of 8 | 0 of 8 | 8 of 8  | 8 of 8 | 8 of 8 | 0 of 8     | 0 of 8 | 0 of 8 |
| FGR 2                | 1     | 0 of 8           | 0 of 8 | 0 of 8 | 0 of 8  | 0 of 8 | 0 of 8 | 0 of 8     | 0 of 8 | 0 of 8 |
| FGR 3                | 1     | 0 of 8           | 0 of 8 | 0 of 8 | 1 of 8  | 0 of 8 | 0 of 8 | 1 of 8     | 0 of 8 | 0 of 8 |
| FGR 4                | 1     | 0 of 8           | 0 of 8 | 0 of 8 | 0 of 8  | 0 of 8 | 0 of 8 | 0 of 8     | 0 of 8 | 0 of 8 |
| FGR 5                | 1     | 0 of 8           | 0 of 8 | 0 of 8 | 0 of 8  | 1 of 8 | 1 of 8 | 0 of 8     | 0 of 8 | 0 of 8 |
| FGR 6                | 1     | 8 of 8           | 7 of 8 | 5 of 8 | 8 of 8  | 8 of 8 | 8 of 8 | 6 of 8     | 7 of 8 | 7 of 8 |

Each cell for each patient and 27 models considered (different columns) indicates how many wrong predictions were made for this patient among all 4 or 8 available samples (for example, the entry 0 of 4 means that 0 errors were made among 4 predictions). The cell is highlighted in red if at least one mistake was made for the patient. Third column in the first panel corresponds to the best model, using *nnet* ML algorithm, and both stereology and PCR data for peripheral samples. This model returns only one wrong prediction out of 60 samples considered.

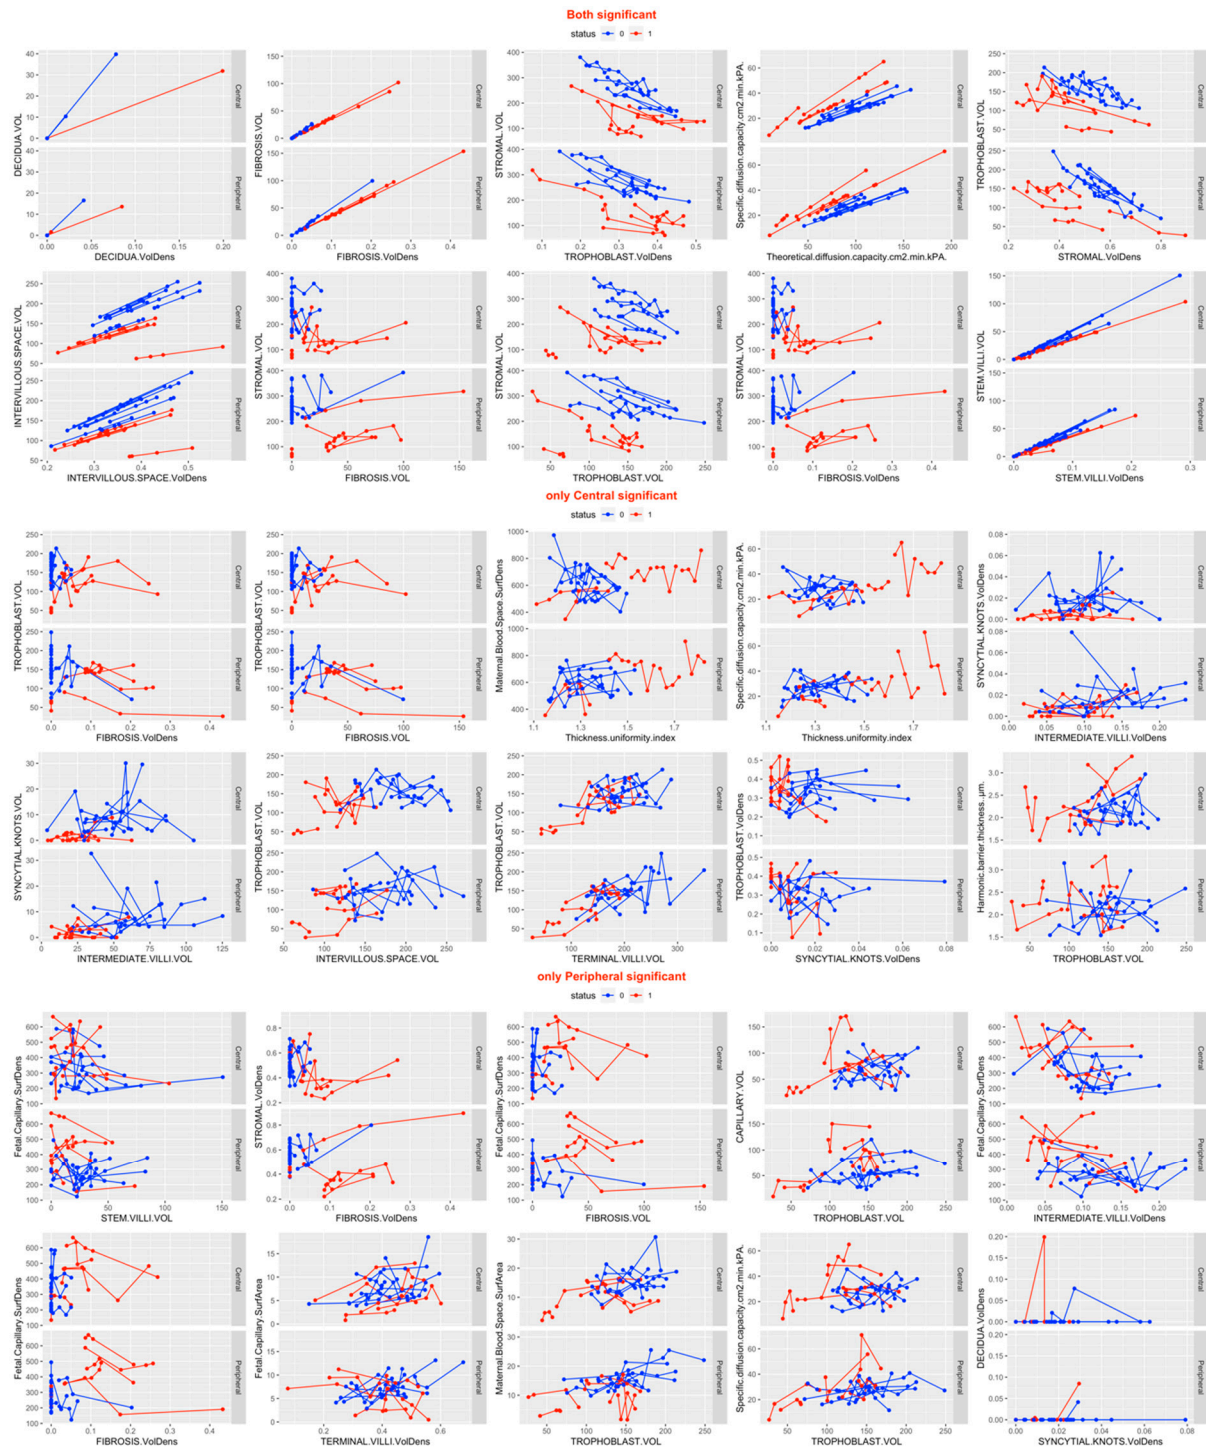

**Supplementary Figure S1: Different interdependencies of features for stereological data.**

Different interdependencies of features for Control (blue colour) and FGR (red colour) on stereological data. Each point is a separate patient measurement, each line connects all measurements for each patient. For many pairs of features, a separation between FGR cases and controls was easily seen, hence, enabling a construction of a successful predictive model.
